# Supplementary material for: NADPH oxidase inhibition prevents beta cell dysfunction induced by prolonged elevation of oleate in rodents
Source: PubMed Central journal article supplement — Diabetologia. 2013 Feb 21;56(5):1078–87. doi: 10.1007/s00125-013-2858-4 (PMC3622749; doi:10.1007/s00125-013-2858-4), 2013-02-21
Supplement: 125_2013_2858_MOESM1_ESM.pdf [file 125_2013_2858_MOESM1_ESM.pdf]

**ESM Fig. 1**

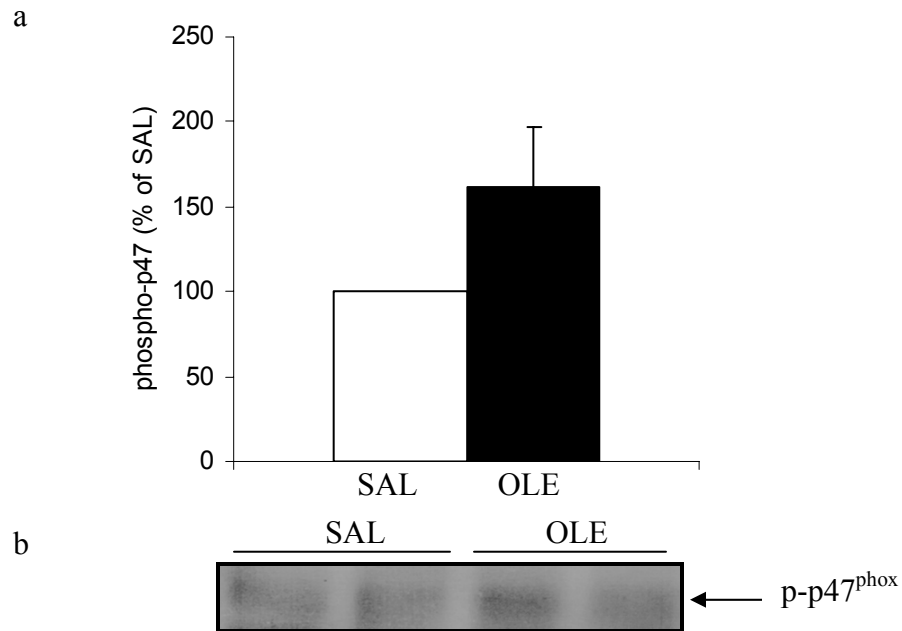

**a.** p47<sup>phox</sup> phosphorylation levels in islets of rats treated for 48 h with saline (SAL) or oleate (OLE). Phosphorylation was measured by Western blot using the anti-phospho-Serine328 (PKC phosphorylation site) rabbit polyclonal antibody provided by Dr. Jamel El-Benna. Data are means  $\pm$  SEM ( $n = 6$ ). **b.** Representative blot.
